# Supplementary material for: High Throughput Sequencing and Proteomics to Identify Immunogenic Proteins of a New Pathogen: The Dirty Genome Approach
Source: PLoS One. 2009 Dec 23;4(12):e8423. doi: 10.1371/journal.pone.0008423 (PMC2793016; doi:10.1371/journal.pone.0008423)
Supplement: Table S1 — Identification of P. acanthamoebae immunogenic proteins. Putative protein description of each immunogenic protein identified by mass spectrometry, according to BLASTP results against nr database or Chlamydiales genomes, respectively. Note that one protein spot, as for exemple F or P, can match with similar MS scores with two different ORFs, resulting in two different protein descriptions. Moreover, different spots such as D, T and U, can match with different ORFs which have the same protein description and thus correspond to orthologous or paralogous proteins. (0.03 MB XLS) [file pone.0008423.s002.xls]

## Sheet: Feuille1
Spot number	ORFs	Best blast against nr database	E value°	Accession number	Best blast against Chlamydiales genomes$	E value°	Accession number
A*	pah_c045o128	Molecular chaperone DnaK [Protochlamydia amoebophila UWE25]	0.0	ref|YP_008498.1|
B	pah_c026o096	Manganese and iron superoxide dismutase [Geobacter bemidjiensis Bem]	2e-56	ref|ZP_01777155.1|	Superoxide dismutase [Chlamydia trachomatis 434/Bu]	6e-12	ref|YP_001654623.1|
C*	pah_c004o137	30S ribosomal protein S1 [Protochlamydia amoebophila UWE25]	0.0	ref|YP_007763.1|
D*	pah_c022o157	Chaperonin GroEL [Protochlamydia amoebophila UWE25]	0.0	ref|YP_008179.1|
E	pah_c004o016	No significant similarity found
F	pah_c004o105	Probable 50S ribosomal protein L7/L12 [Protochlamydia amoebophila UWE25]	4e-15	ref|YP_007602.1|
	pah_c209o015	Hypothetical protein pc1895 [Protochlamydia amoebophila UWE25]	1e-31	ref|YP_008894.1|
G	pah_c013o045	Putative serine proteinase [Protochlamydia amoebophila UWE25]	1e-121	ref|YP_008290.1|
H*	pah_c004o095	Elongation factor Tu [Protochlamydia amoebophila UWE25]	0.0	ref|YP_007594.1|
I*	pah_c056o013	No significant similarity found
J	pah_c178o011	No significant similarity found			Putative hyperosmotically inducible periplasmic protein [Protochlamydia amoebophila UWE25]	4e-04	ref|YP_008170.1|
K*	pah_c029o043	Hypothetical protein pc1399 [Protochlamydia amoebophila UWE25]	1e-09	ref|YP_008398.1|
L*	pah_c189o005	Putative elongation factor Ts (EF-Ts) [Protochlamydia amoebophila UWE25]	8e-110	emb|CAF22861.1|
M	pah_c029o063	NAD(P)H-dependent glycerol-3-phosphate dehydrogenase [Protochlamydia amoebophila UWE25]	5e-126	ref|YP_007082.1|
N	pah_c008o010	No significant similarity found
O	pah_c253o019	Putative mip [Protochlamydia amoebophila UWE25]	1e-76	ref|YP_007382.1|
P	pah_c050o014	Hypothetical protein pc0946 [Protochlamydia amoebophila UWE25]	2e-22	ref|YP_007945.1
	pah_c022o049	No significant similarity found
Q	pah_c030o014	Hypothetical protein PM8797T_02589 [Planctomyces maris DSM 8797]	2e-42	ref|ZP_01857360.1|	Probable yciF protein [Protochlamydia amoebophila UWE25]	1e-40	ref|YP_007952.1|
R	pah_c022o156	Co-chaperonin GroES [Protochlamydia amoebophila UWE25]	3e-37	ref|YP_008178.1|
S	pah_c014o167	Probable chaperonin GroES [Protochlamydia amoebophila UWE25]	4e-28	ref|YP_007030.1|
T*#	pah_c014c169	Probable 60 kDa chaperonin (GroEL) [Protochlamydia amoebophila UWE25]	0.0	ref|YP_007029.1|
U*#	pah_c180o043	Probable heat shock protein GroEL [Protochlamydia amoebophila UWE25]	0.0	ref|YP_008258.1|
* positive with 2/2 rabbit sera
° only proteins with e-value >=0.001 were considered
$ only provided if different than best blast against nr database
# not visible on the 2D map presented here but detected on other 2D gels
