# Supplementary material for: High Throughput Sequencing and Proteomics to Identify Immunogenic Proteins of a New Pathogen: The Dirty Genome Approach
Source: PLoS One. 2009 Dec 23;4(12):e8423. doi: 10.1371/journal.pone.0008423 (PMC2793016; doi:10.1371/journal.pone.0008423)
Supplement: Table S2 — Western blot recognition of identified immunogenic proteins with human sera. Immunogenic proteins identified by mass spectrometry (see Table S1) were tested by western blotting of 2D gels with two sera positive for P. acanthamoebae, two sera positive for C. pneumoniae, one serum positive for C. psittaci and two sera negative for most Chlamydiales. Results are evaluated in the perspective of a Parachlamydia specific serological diagnostic test. (0.03 MB XLS) [file pone.0008423.s003.xls]

## Sheet: Feuille1
Spot number	Best blast against nr database	P. acanthamoebae positive sera		C. pneumoniae positive sera		C. psittaci positive serum	Chlamydiales negative sera		Comment
A*	Molecular chaperone DnaK	yes	no	no	yes	no	no	no	High similarity with protein of other species and
									cross reaction with C.pneumoniae
B	Manganese and iron superoxide dismutase	no	no	no	no	no	no	no	Possible candidate. To be further tested with additional
									Parachlamydia positive human sera
C*	30S ribosomal protein S1	no	no	no	yes	no	no	no	High similarity with protein of other species and
									cross reaction with C.pneumoniae
D*	Chaperonin GroEL	yes	yes	no	yes	no	yes	no	High similarity with protein of other species and
									cross reaction with C.pneumoniae and negative controls
E	No significant similarity found	yes	no	no	no	no	no	no	Good candidate
F	Probable 50S ribosomal protein L7/L12 or	yes	yes	yes	no	no	no	no	High similarity with protein of other species and
	Hypothetical protein pc1895								cross reaction with C.pneumoniae
G	Putative serine proteinase	no	no	no	no	no	no	yes	Cross reaction with negative controls
H*	Elongation factor Tu	yes	yes	no	no	no	no	yes	High similarity with protein of other species and
									cross reaction with negative controls
I*	No significant similarity found	no	no	no	yes	no	no	no	Cross reaction with C.pneumoniae
J	No significant similarity found	yes	yes	no	yes	yes	yes	yes	Cross reaction with C.pneumoniae, C.psittaci and negative controls
K*	Hypothetical protein pc1399	no	no	no	yes	yes	yes	yes	Cross reaction with C.pneumoniae, C.psittaci and negative controls
L*	Putative elongation factor Ts	yes	yes	no	yes	yes	no	no	High similarity with protein of other species and
									cross reaction with C.pneumoniae and C.psittaci
M	NAD(P)H-dependent glycerol-3-phosphate dehydrogenase	no	no	no	no	no	no	no	Possible candidate. To be further tested with additional
									Parachlamydia positive human sera
N	No significant similarity found	yes	no	no	no	no	no	no	Good candidate
O	Putative mip	yes	no	no	no	no	no	yes	Cross reaction with negative controls
P	Hypothetical protein pc0946 or	yes	no	no	yes	no	no	no	Cross reaction with C.pneumoniae
	no significant similarity found
Q	Hypothetical protein PM8797T_02589	no	no	no	no	no	no	no	Possible candidate. To be further tested with additional
									Parachlamydia positive human sera
R	Co-chaperonin GroES	yes	yes	no	no	no	no	no	High similarity with protein of other species
S	Probable chaperonin GroES	yes	yes	no	no	no	no	no	High similarity with protein of other species
T*	Probable 60 kDa chaperonin (GroEL)	yes	no	no	yes	no	no	yes	High similarity with protein of other species and
									cross reaction with C.pneumoniae and negative controls
U*	Probable heat shock protein GroEL	no	no	no	yes	no	no	yes	High similarity with protein of other species and
									cross reaction with C.pneumoniae and negative controls
* positive with 2/2 rabbit sera
